# Supplementary material
Source: PubMed Central journal article supplement (PMC5493734)
Supplement: rsbl20170073supp1.pdf [file rsbl20170073supp1.pdf]

## Electronic supplementary material

**Table S1.** Estimates of all factor levels from models given in Table 1.

| variable                              | estimate | se     | lower   | upper   |
|---------------------------------------|----------|--------|---------|---------|
| <b>(a) total annual distance (km)</b> |          |        |         |         |
| sex                                   |          |        |         |         |
| female                                | 50978.3  | 3454.8 | 43971.6 | 57985.0 |
| male                                  | 60807.5  | 2250.6 | 56243.0 | 65372.0 |
| population                            |          |        |         |         |
| France                                | 49987.9  | 3616.8 | 42652.6 | 57323.2 |
| Netherlands                           | 59523.8  | 2364.7 | 54728.0 | 64319.5 |
| Denmark                               | 66713.0  | 5905.9 | 54735.3 | 78690.7 |
| <b>(b) mean daily distance (km)</b>   |          |        |         |         |
| phase:sex                             |          |        |         |         |
| breeding-female                       | 113.5    | 18.6   | 76.7    | 150.3   |
| autumn migration-female               | 320.7    | 18.6   | 283.9   | 357.5   |
| winter-female                         | 125.0    | 18.6   | 88.2    | 161.8   |
| spring migration-female               | 246.1    | 18.6   | 209.3   | 282.9   |
| breeding-male                         | 212.4    | 12.0   | 188.7   | 236.1   |
| autumn migration-male                 | 285.8    | 12.0   | 262.2   | 309.5   |
| winter-male                           | 116.5    | 12.0   | 92.8    | 140.2   |
| spring migration-male                 | 255.8    | 12.0   | 232.1   | 279.5   |
| phase:population                      |          |        |         |         |
| breeding-France                       | 111.1    | 20.0   | 71.6    | 150.7   |
| autumn migration-France               | 285.6    | 20.0   | 246.0   | 325.1   |
| winter-France                         | 125.1    | 20.0   | 85.6    | 164.7   |
| spring migration-France               | 242.1    | 20.0   | 202.6   | 281.7   |
| breeding-Netherlands                  | 202.1    | 12.5   | 177.4   | 226.8   |
| autumn migration-Netherlands          | 304.1    | 12.5   | 279.3   | 328.8   |
| winter-Netherlands                    | 115.7    | 12.5   | 91.0    | 140.4   |
| spring migration-Netherlands          | 255.3    | 12.5   | 230.6   | 280.0   |
| breeding-Denmark                      | 235.8    | 31.5   | 173.6   | 298.0   |
| autumn migration-Denmark              | 272.8    | 31.5   | 210.6   | 335.0   |
| winter-Denmark                        | 126.0    | 31.5   | 63.8    | 188.2   |
| spring migration-Denmark              | 264.1    | 31.5   | 201.9   | 326.3   |
| <b>(c) cumulative distance (km)</b>   |          |        |         |         |
| phase:sex                             |          |        |         |         |
| breeding-female                       | 11511.2  | 1499.2 | 8547.8  | 14474.6 |
| autumn migration-female               | 6954.4   | 1499.2 | 3991.0  | 9917.8  |
| winter-female                         | 23987.7  | 1499.2 | 21024.3 | 26951.1 |
| spring migration-female               | 8580.2   | 1499.2 | 5616.8  | 11543.5 |
| breeding-male                         | 22883.6  | 965.5  | 20975.1 | 24792.0 |
| autumn migration-male                 | 7177.4   | 965.5  | 5269.0  | 9085.9  |
| winter-male                           | 22054.8  | 965.5  | 20146.3 | 23963.2 |
| spring migration-male                 | 8641.5   | 965.5  | 6733.0  | 10549.9 |
| phase:population                      |          |        |         |         |
| breeding-France                       | 13443.8  | 1608.3 | 10264.8 | 16622.7 |
| autumn migration-France               | 6086.7   | 1608.3 | 2907.8  | 9265.7  |
| winter-France                         | 23305.4  | 1608.3 | 20126.5 | 26484.4 |
| spring migration-France               | 7364.4   | 1608.3 | 4185.4  | 10543.3 |
| breeding-Netherlands                  | 20936.6  | 1007.6 | 18945.0 | 22928.2 |
| autumn migration-Netherlands          | 7366.8   | 1007.6 | 5375.2  | 9358.4  |
| winter-Netherlands                    | 22209.6  | 1007.6 | 20218.0 | 24201.2 |
| spring migration-Netherlands          | 8877.9   | 1007.6 | 6886.3  | 10869.5 |
| breeding-Denmark                      | 25021.1  | 2535.1 | 20010.3 | 30031.9 |
| autumn migration-Denmark              | 8004.0   | 2535.1 | 2993.2  | 13014.8 |
| winter-Denmark                        | 23720.8  | 2535.1 | 18710.0 | 28731.6 |
| spring migration-Denmark              | 10113.4  | 2535.1 | 5102.6  | 15124.2 |

**Table S2.** Model output of post-hoc tests on total annual distance between populations, as well as mean daily distance and cumulative distance between annual cycle phases.

| variable                                                                   | estimate | $\chi^2$ -value | P-value |
|----------------------------------------------------------------------------|----------|-----------------|---------|
| <b>(a) post-hoc test population differences total annual distance (km)</b> |          |                 |         |
| F-NL                                                                       | -9535.8  | 4.77            | 0.06    |
| F-DK                                                                       | -16725.1 | 5.99            | 0.04    |
| NL-DK                                                                      | -7189.3  | 1.25            | 0.26    |
| <b>(b) post-hoc test phase differences mean daily distance (km)</b>        |          |                 |         |
| breeding-autumn migration                                                  | -131.18  | 5.96            | <0.001  |
| breeding-winter                                                            | 39.27    | 5.11            | 0.03    |
| breeding-spring migration                                                  | -88.64   | 26.01           | <0.001  |
| autumn migration-winter                                                    | 170.46   | 96.18           | <0.001  |
| autumn migration-spring migration                                          | 42.54    | 5.99            | 0.03    |
| winter-spring migration                                                    | -127.92  | 54.16           | <0.001  |
| <b>(c) post-hoc test phase differences cumulative distance (km)</b>        |          |                 |         |
| breeding-autumn migration                                                  | 10418.1  | 57.23           | <0.001  |
| breeding-winter                                                            | -5939.2  | 18.60           | <0.001  |
| breeding-spring migration                                                  | 8753.1   | 40.40           | <0.001  |
| autumn migration-winter                                                    | -16357.3 | 141.08          | <0.001  |
| autumn migration-spring migration                                          | -1665.1  | 1.46            | 0.23    |
| winter-spring migration                                                    | 14692.2  | 113.82          | <0.001  |

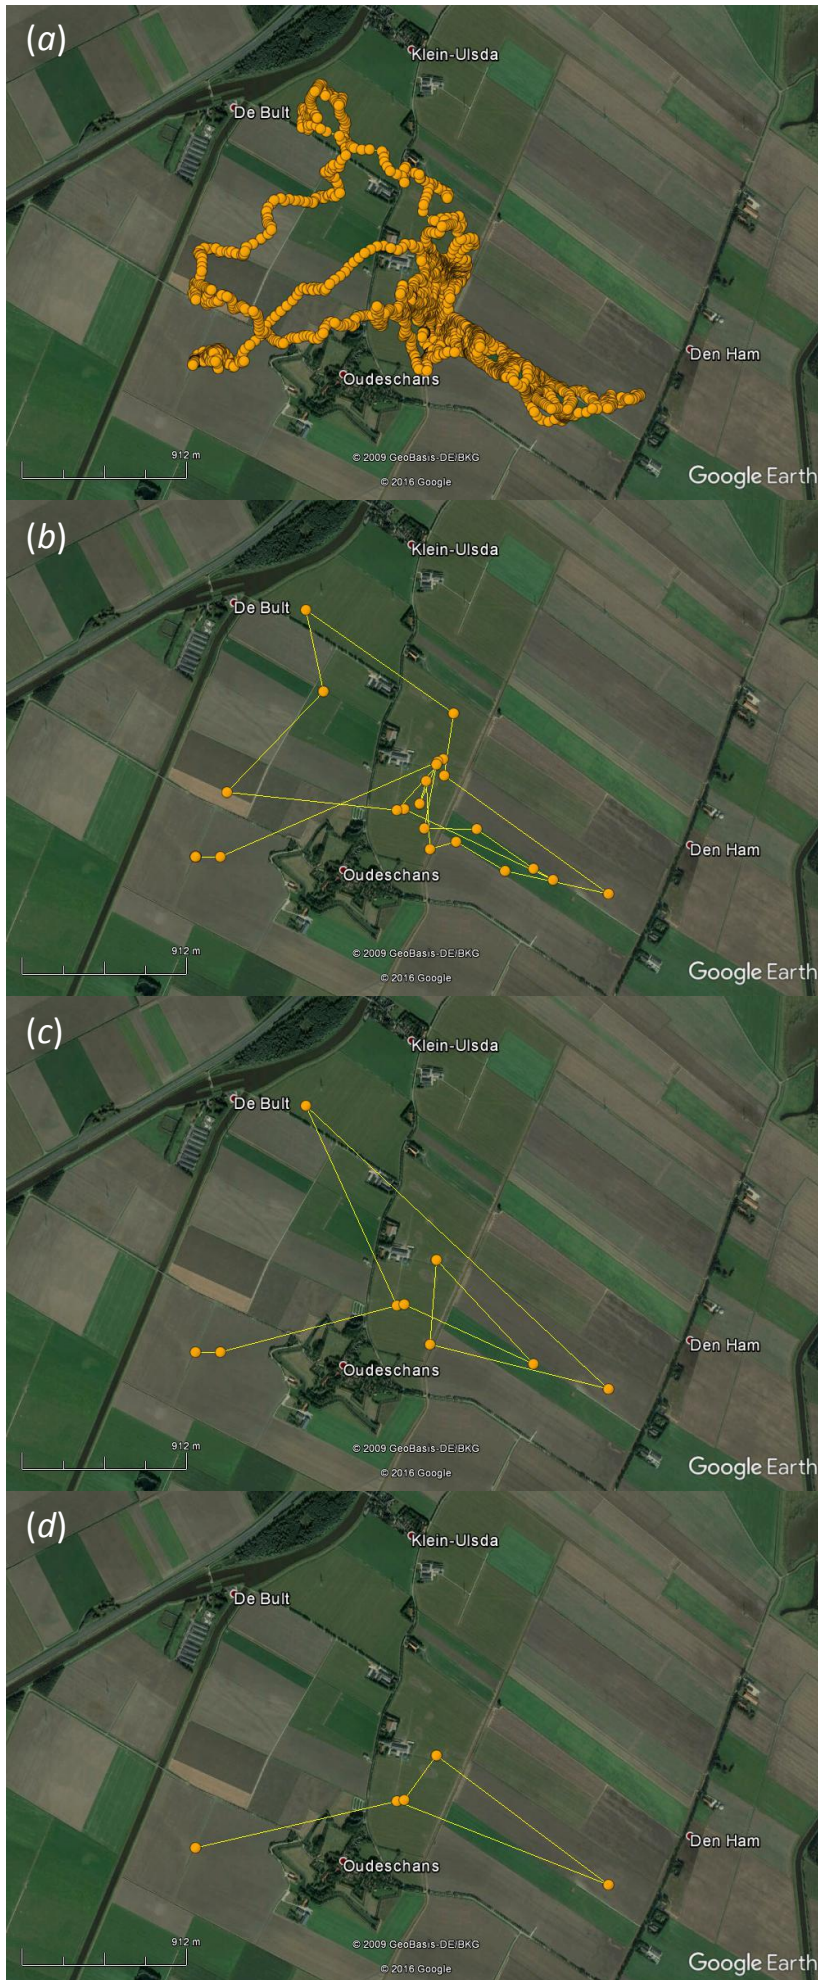

**Figure S1:** (a) Two hours of high-resolution (3 seconds interval) track of male Montagu's harrier Elzo (ID 428) on 24 May 2012 during the breeding season in the Netherlands. Same track subsampled to (b) 5 min, (c) 15 min, and (d) 30 min interval. Distances calculated between consecutive positions: (a) 30.4 km, (b) 10.4 km, (c) 7.7 km, (d) 3.9 km.

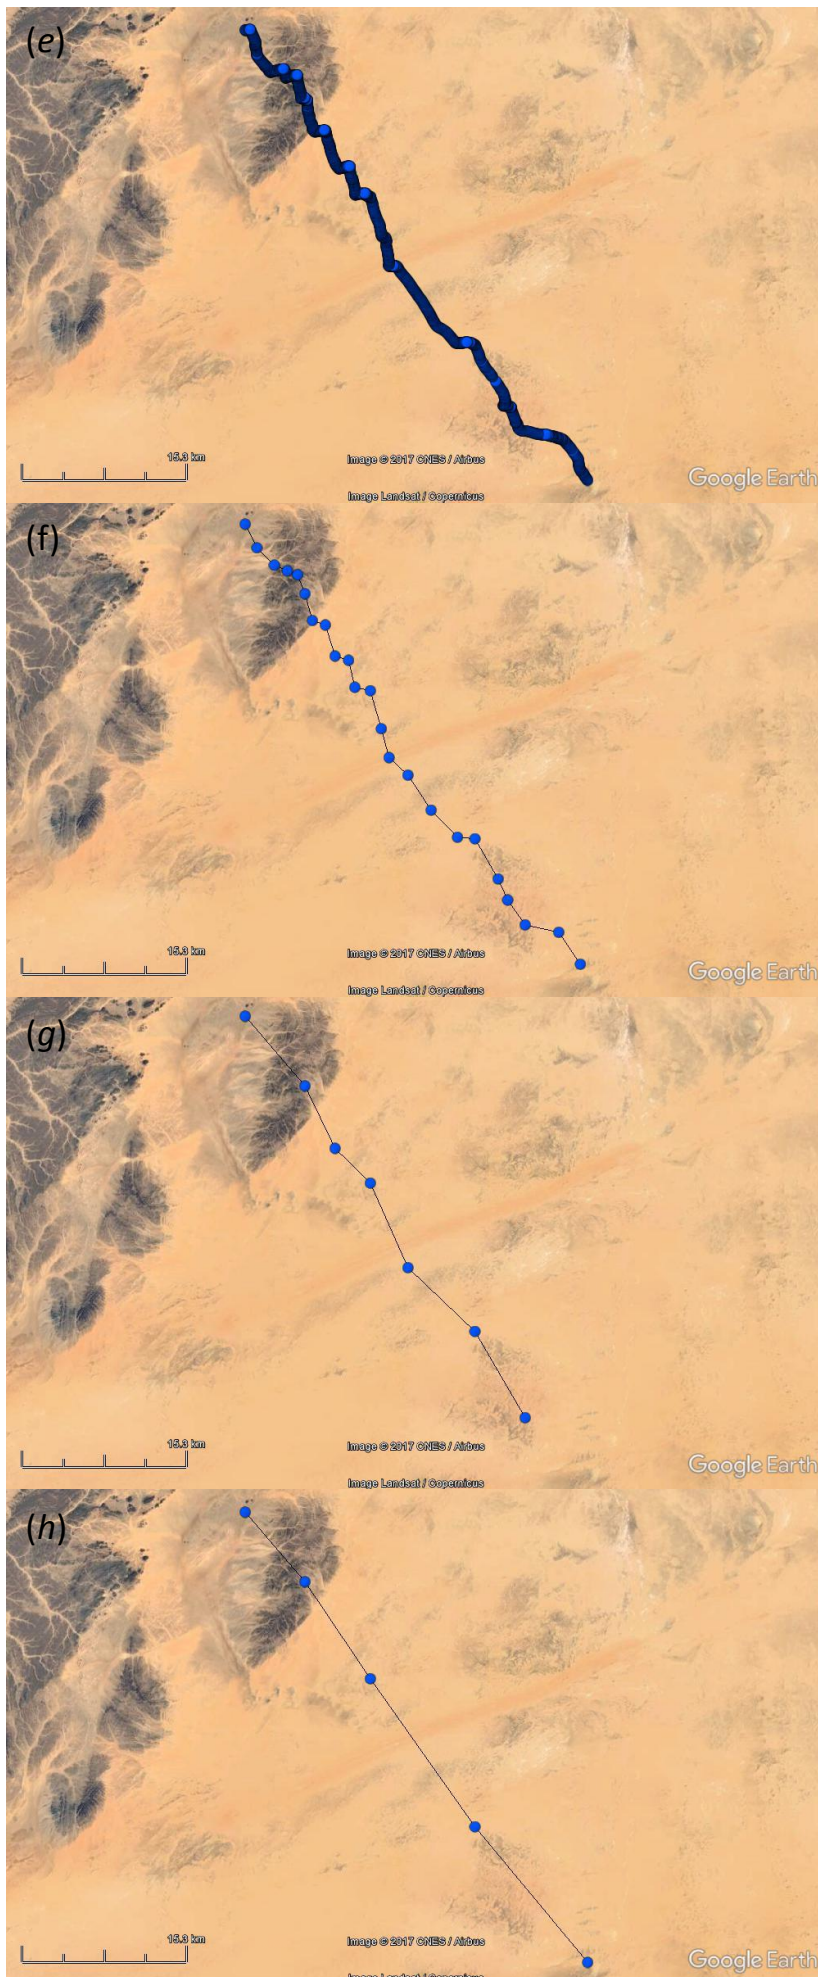

**Figure S1 continued:** (e) Two hours of high-resolution (3 seconds interval) track of male Montagu's harrier Elzo (ID 428) on 19 September 2011 during autumn migration crossing the Sahara desert. Same track subsampled to (f) 5 min, (g) 15 min, and (h) 30 min interval. Distances calculated between consecutive positions: (e) 65 km, (f) 56 km, (g) 46 km, (h) 53 km.

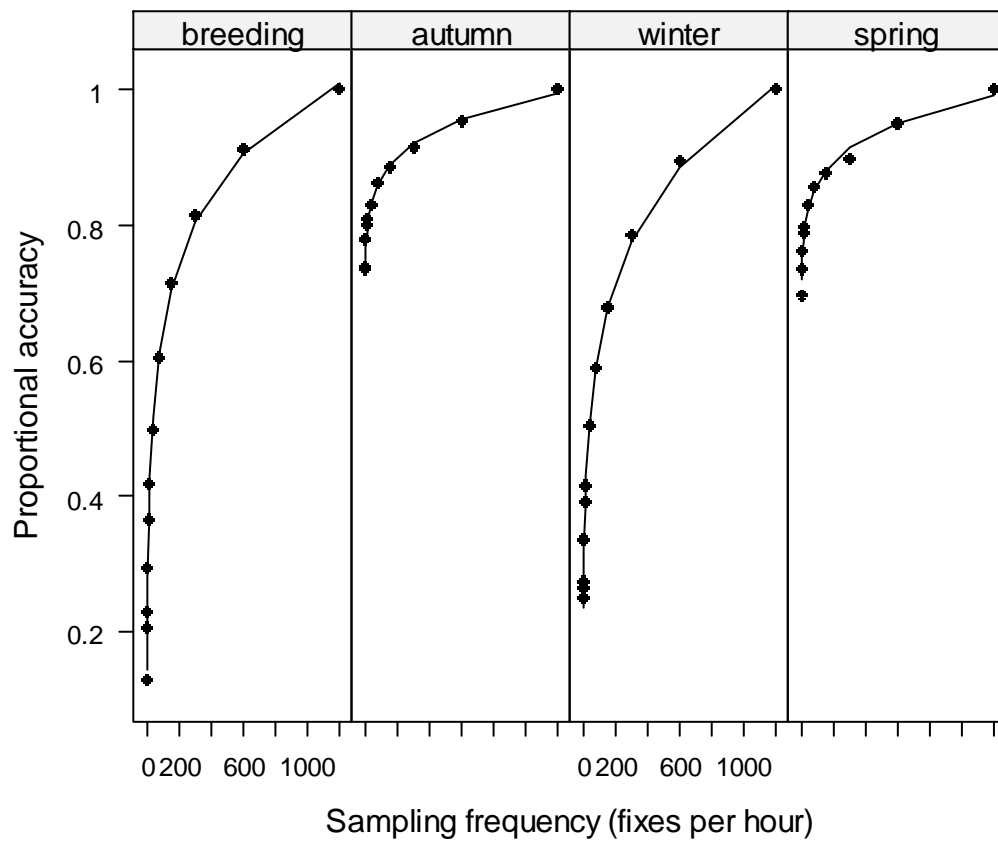

**Figure S2:** Proportional accuracy (ratio of apparent to true distance travelled) in relation to sampling frequency for GPS-tracked Montagu's harriers. The nonlinear least-squares estimates of the parameters were estimated fitting a non-linear model ( $y = ax^b + c$ ) using R-function *nls* (breeding:  $y = 330.57x^{0.036} - 324.41$ ; autumn migration:  $y = 27.38x^{0.1} + 43.9$ ; winter:  $y = 47.16x^{0.142} - 28.41$ ; spring migration:  $y = 22.68x^{0.117} + 47.35$ ).

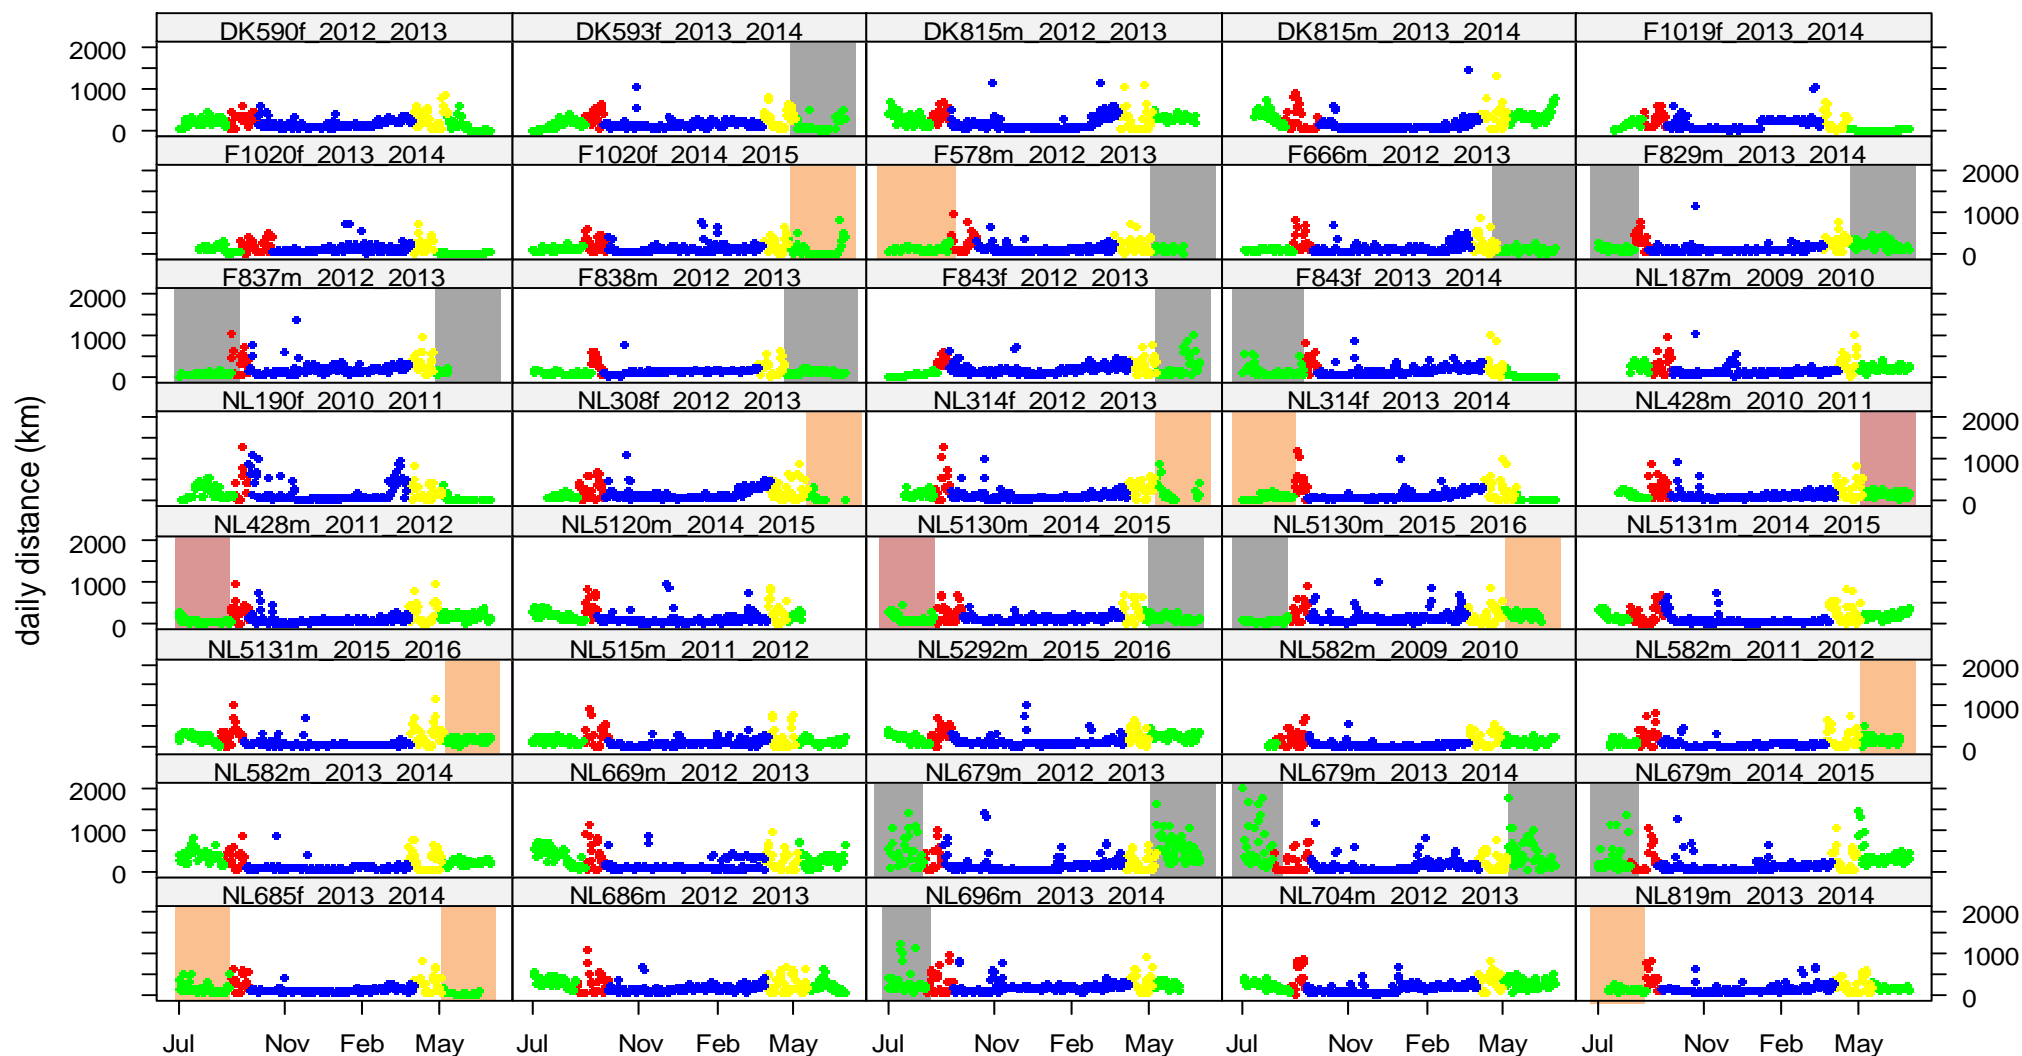

**Figure S3:** Daily distance travelled by Montagu's Harriers tracked by GPS-trackers during a whole annual cycle. Names of individuals are composed of country acronym (DK = Denmark, F = France, NL = Netherlands), the GPS-tracker ID, sex of the bird (f = female, m = male), and the years considered (data from 1 July in year 1 to 30 June in year 2). Colours indicate annual cycle phases (green = breeding, red = autumn migration, blue = winter, yellow = spring migration). Background colours indicate breeding fate (gray = non-breeder, orange = nest failure during egg phase, red = nest failure during chick phase). Distances were corrected according to sampling interval and annual cycle phase.
